# Supplementary material for: A homogeneous p–n junction diode by selective doping of few layer MoSe2 using ultraviolet ozone for high-performance photovoltaic devices
Source: Royal Society of Chemistry journal article supplement (doi:10.1039/c9nr04212a), 2019-01-01
Supplement: c9nr04212a1.pdf [file c9nr04212a1.pdf]

## Supporting Information

### Homogeneous P-N Junction Diode by Selective Doping Few layer MoSe<sub>2</sub> Using Ultraviolet Ozone for High- Performance Photovoltaic Devices

*Xiaoming Zheng<sup>1,2,3</sup>, Yuehua Wei<sup>3</sup>, Jinxin Liu<sup>1,2</sup>, Shitan Wang<sup>1,2</sup>, Jiao Shi<sup>1,2</sup>, Hang Yang<sup>3</sup>, Gang Peng<sup>3</sup>, Chuyun Deng<sup>3</sup>, Wei Luo<sup>3</sup>, Yuan Zhao<sup>1,2</sup>, Youzhen Li<sup>1,2</sup>, Kuanglv Sun<sup>1,2</sup>, Wen Wan<sup>4</sup>, Haipeng Xie<sup>1,2</sup>, Yongli Gao<sup>1,2</sup>, Xueao Zhang<sup>4\*</sup>, Han Huang<sup>1,2\*</sup>*

<sup>1</sup> Hunan Key Laboratory of Super-microstructure and Ultrafast Process, School of Physics and Electronics, Central South University, Changsha 410083, P. R. China

<sup>2</sup> Powder Metallurgy Research Institute and State Key Laboratory of Powder Metallurgy, Central South University, Changsha 410083, P. R. China

<sup>3</sup> College of Arts and Science, National University of Defense Technology, Changsha, Hunan 410073, China

<sup>4</sup> College of Physical Science and Technology, Xiamen University, Xiamen 361005, China

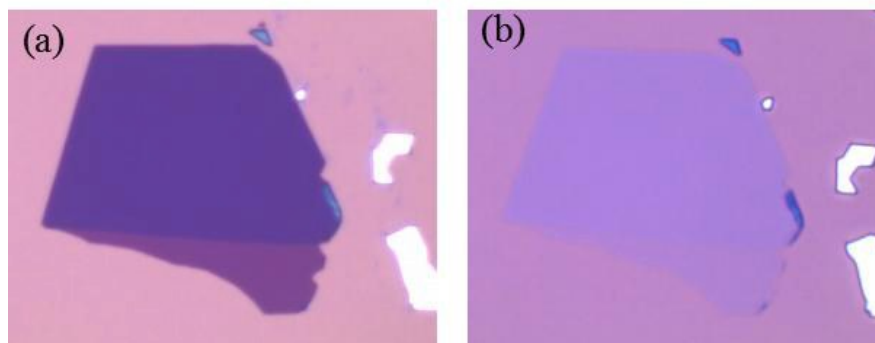

*Figure S1 Optical images of different layer MoSe<sub>2</sub> flakes of before (a) and after (b) UVO treatment for 20 min.*

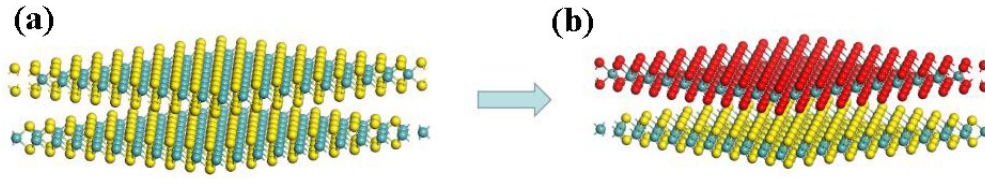

Figure S2 Schematic of atomically thinning MoSe<sub>2</sub> flakes.

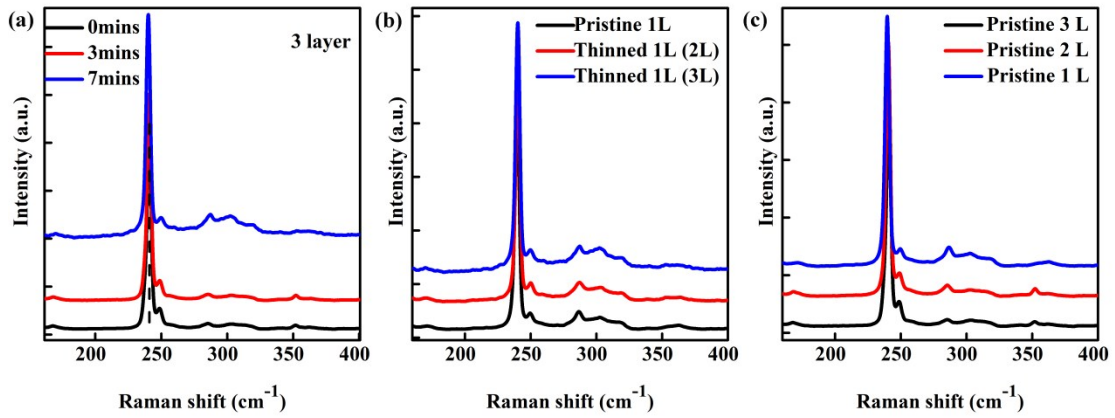

Figure S3 Raman spectra of trilayer MoSe<sub>2</sub> before and after UVO treatment for 3 and 7 mins (a), exfoliated pristine monolayer MoSe<sub>2</sub> and the thinned monolayer by oxidized bilayer and trilayer (b) MoSe<sub>2</sub>, pristine MoSe<sub>2</sub> in different layers.

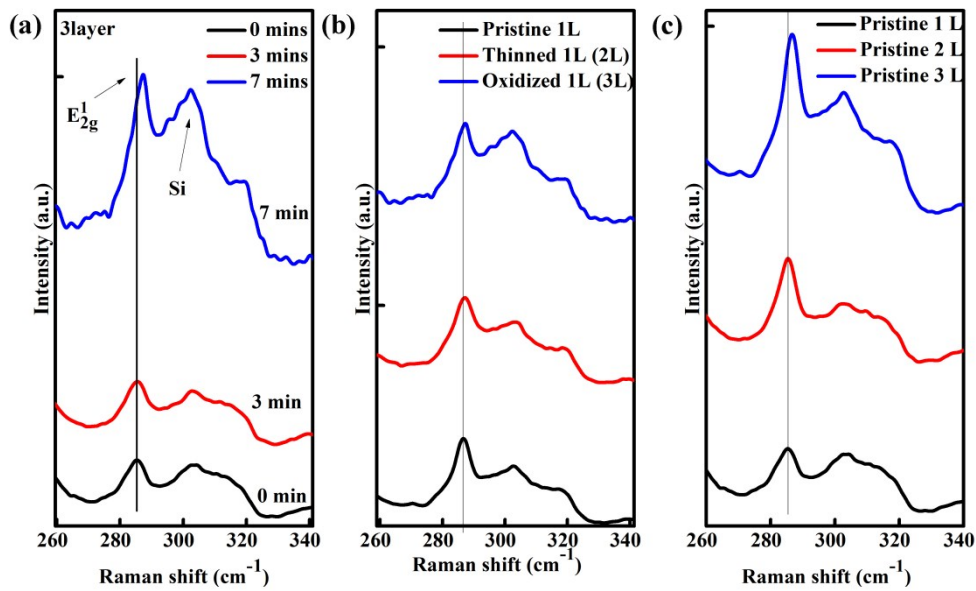

Figure S4 Raman spectra centered at MoSe<sub>2</sub> E<sub>2g</sub><sup>1</sup> peak from samples as in Figure S3.

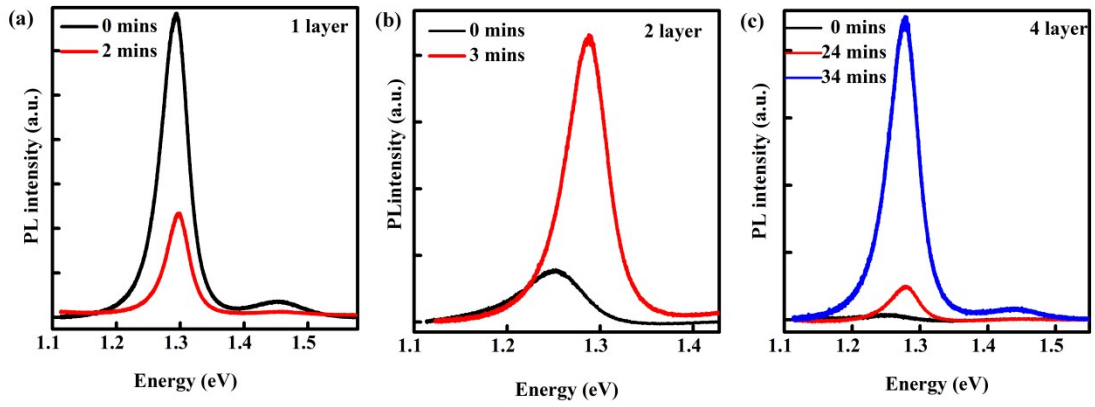

Figure S5 the evolution of Photoluminescence spectra of MoSe<sub>2</sub> before and after UVO treatment:

(a) monolayer, (b) bilayer, (c) four layer

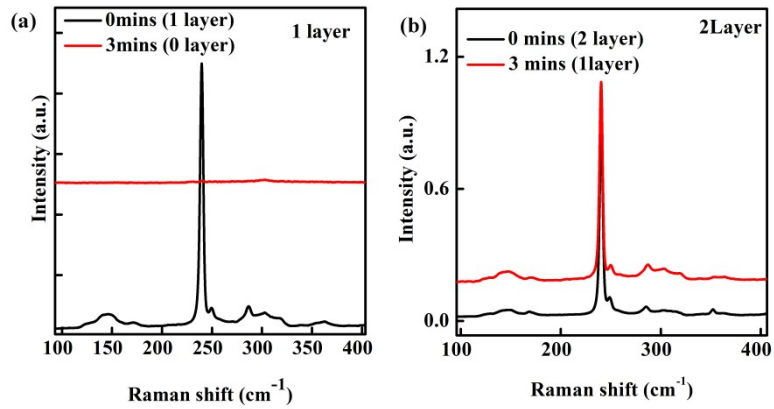

Figure S6 the evolution of Raman spectra of MoSe<sub>2</sub> before and after UVO treatment: (a)

monolayer, (b) bilayer

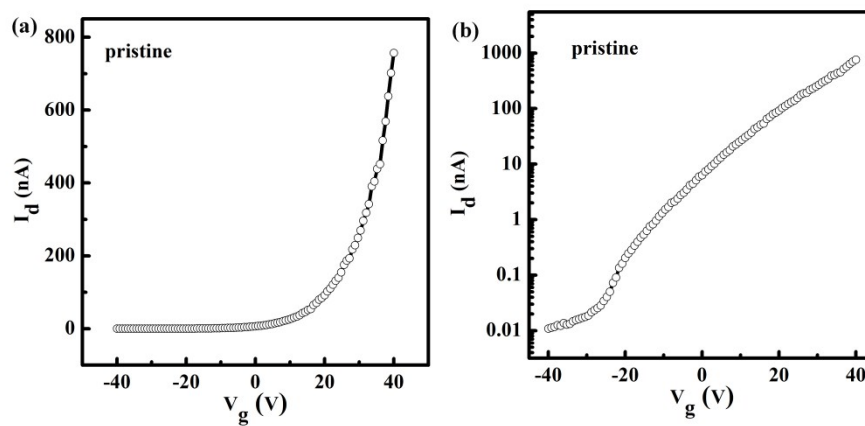

Figure S7.  $I_d$ - $V_g$  characteristics of the MoSe<sub>2</sub> FET with  $V_d = 1$  V for the thick MoSe<sub>2</sub> in

linear (a) and log (b) scale, showing the intrinsic n-type nature.

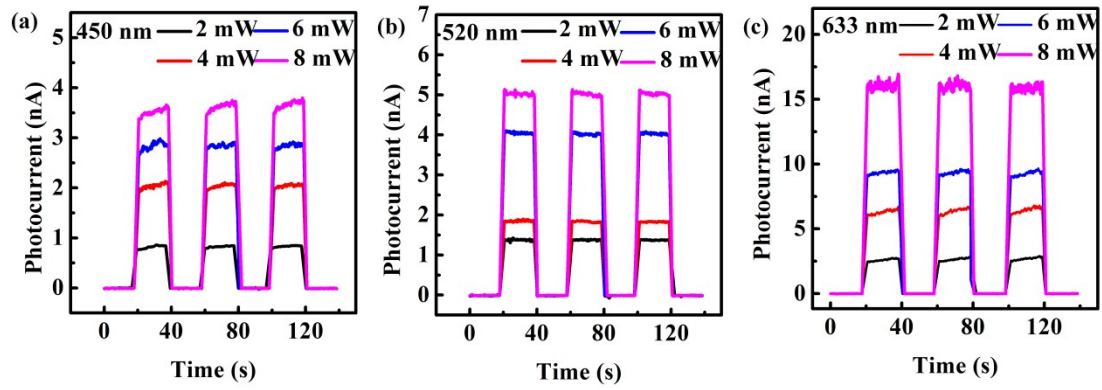

Figure S8. Dynamic optical response of the device ( $V_d=0$  V,  $V_g=0$  V) under illumination of light with 450 nm, 520 nm and 633 nm, as function of different power (2, 4, 6, 8 mW)

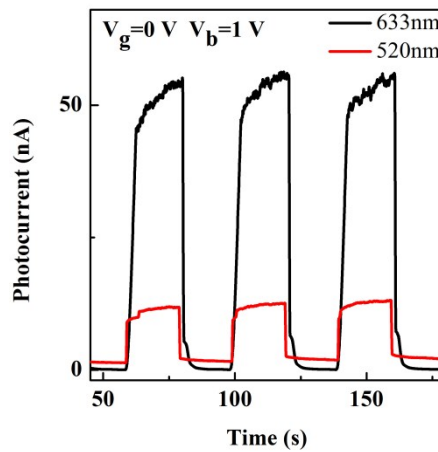

Figure S9 Dynamic optical response of the device ( $V_d=1$  V,  $V_g=0$  V) under illumination of light with 520 nm and 633 nm with 8 mW

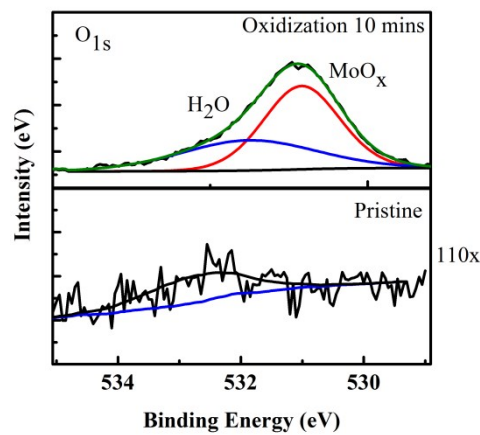

Figure S10 the O 1s core level of XPS spectra for bulk MoSe<sub>2</sub> before and after UVO treatment for 10 mins For the pristine MoSe<sub>2</sub>, there is almost no O. After oxidation treatment, there is an

obvious peak of oxygen, which is correspond absorbed  $H_2O$  and the  $MoOx$ .

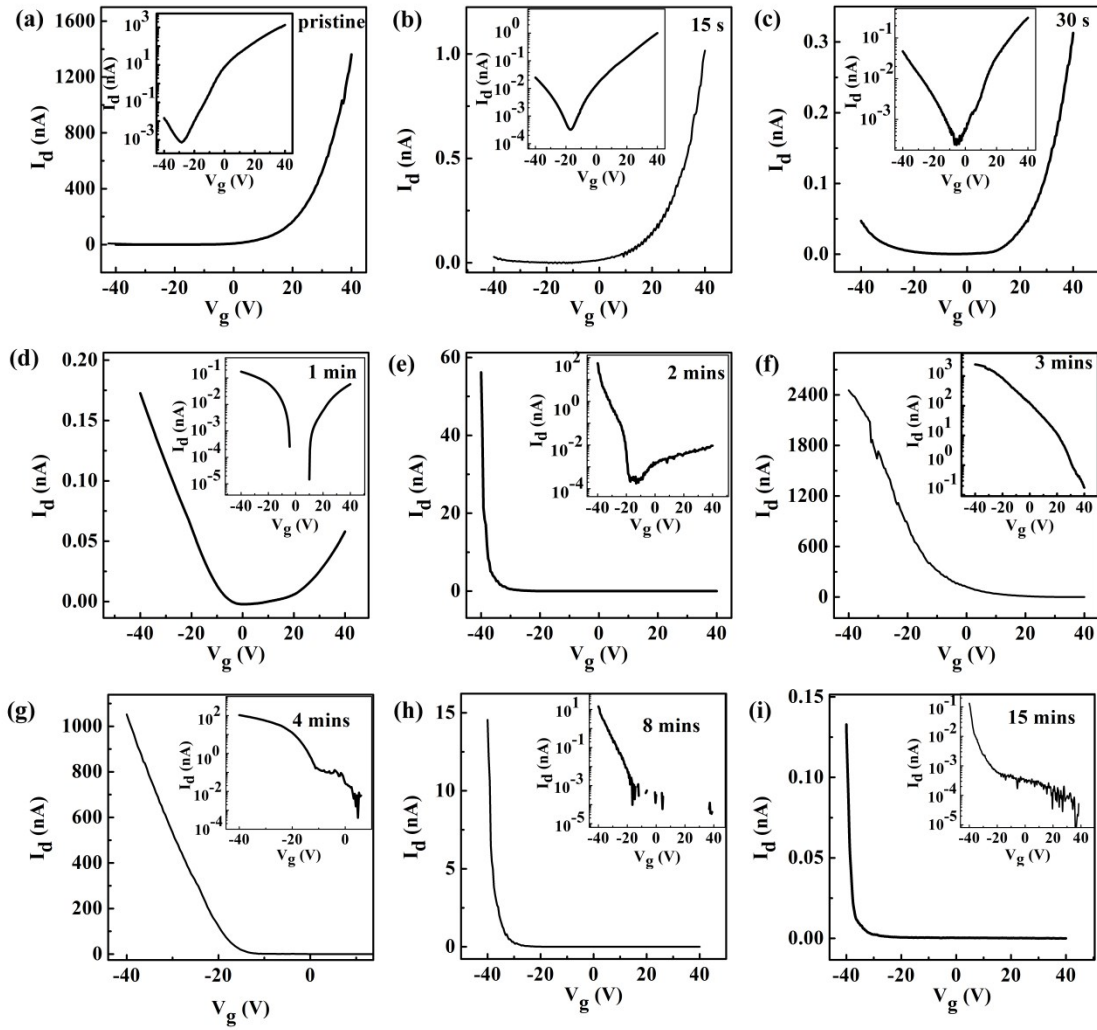

Figure S11 The transfer characteristic of  $MoSe_2$  before (a) and after UVO treatment for 15 s (b), 30s (c), 1min (d), 2mins (e), 3mins (f), 4 mins (g), 8mins (h), 15 mins (i).

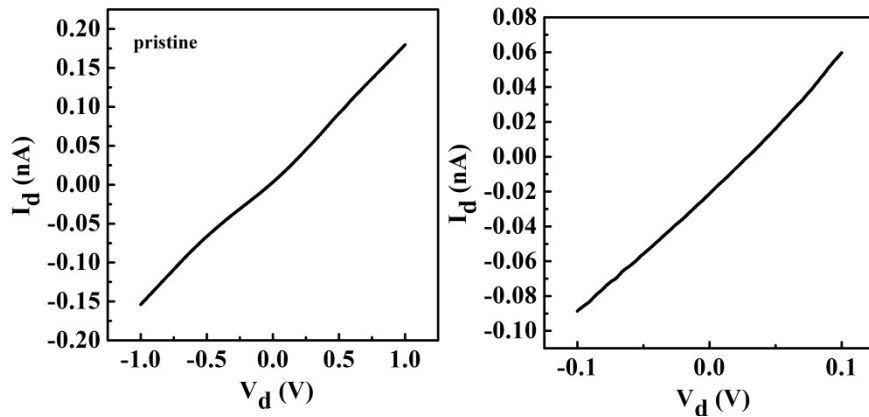

Figure S12 The I-V curves of pristine  $MoSe_2$  with partial PMMA protect.

|       | <b>R(A/W)</b> | <b>EQE(%)</b> | <b>D(Jones)</b>        |
|-------|---------------|---------------|------------------------|
| 633nm | 0.226         | 44.3%         | 1.74x10 <sup>10</sup>  |
| 520nm | 0.071         | 16.5%         | 0.548x10 <sup>10</sup> |
| 450nm | 0.042         | 11.6%         | 0.324x10 <sup>10</sup> |

*TABLE 1. Performance of MoSe<sub>2</sub> p-n Diode*
